# Supplementary figures and images for: Landlord’s construction of defective tenant improvements: Del Taco v University Real Estate, 2003
Source: Atypon-hosted journal article supplement (doi:10.1176/appi.psychotherapy.20190025), 2003-01-01

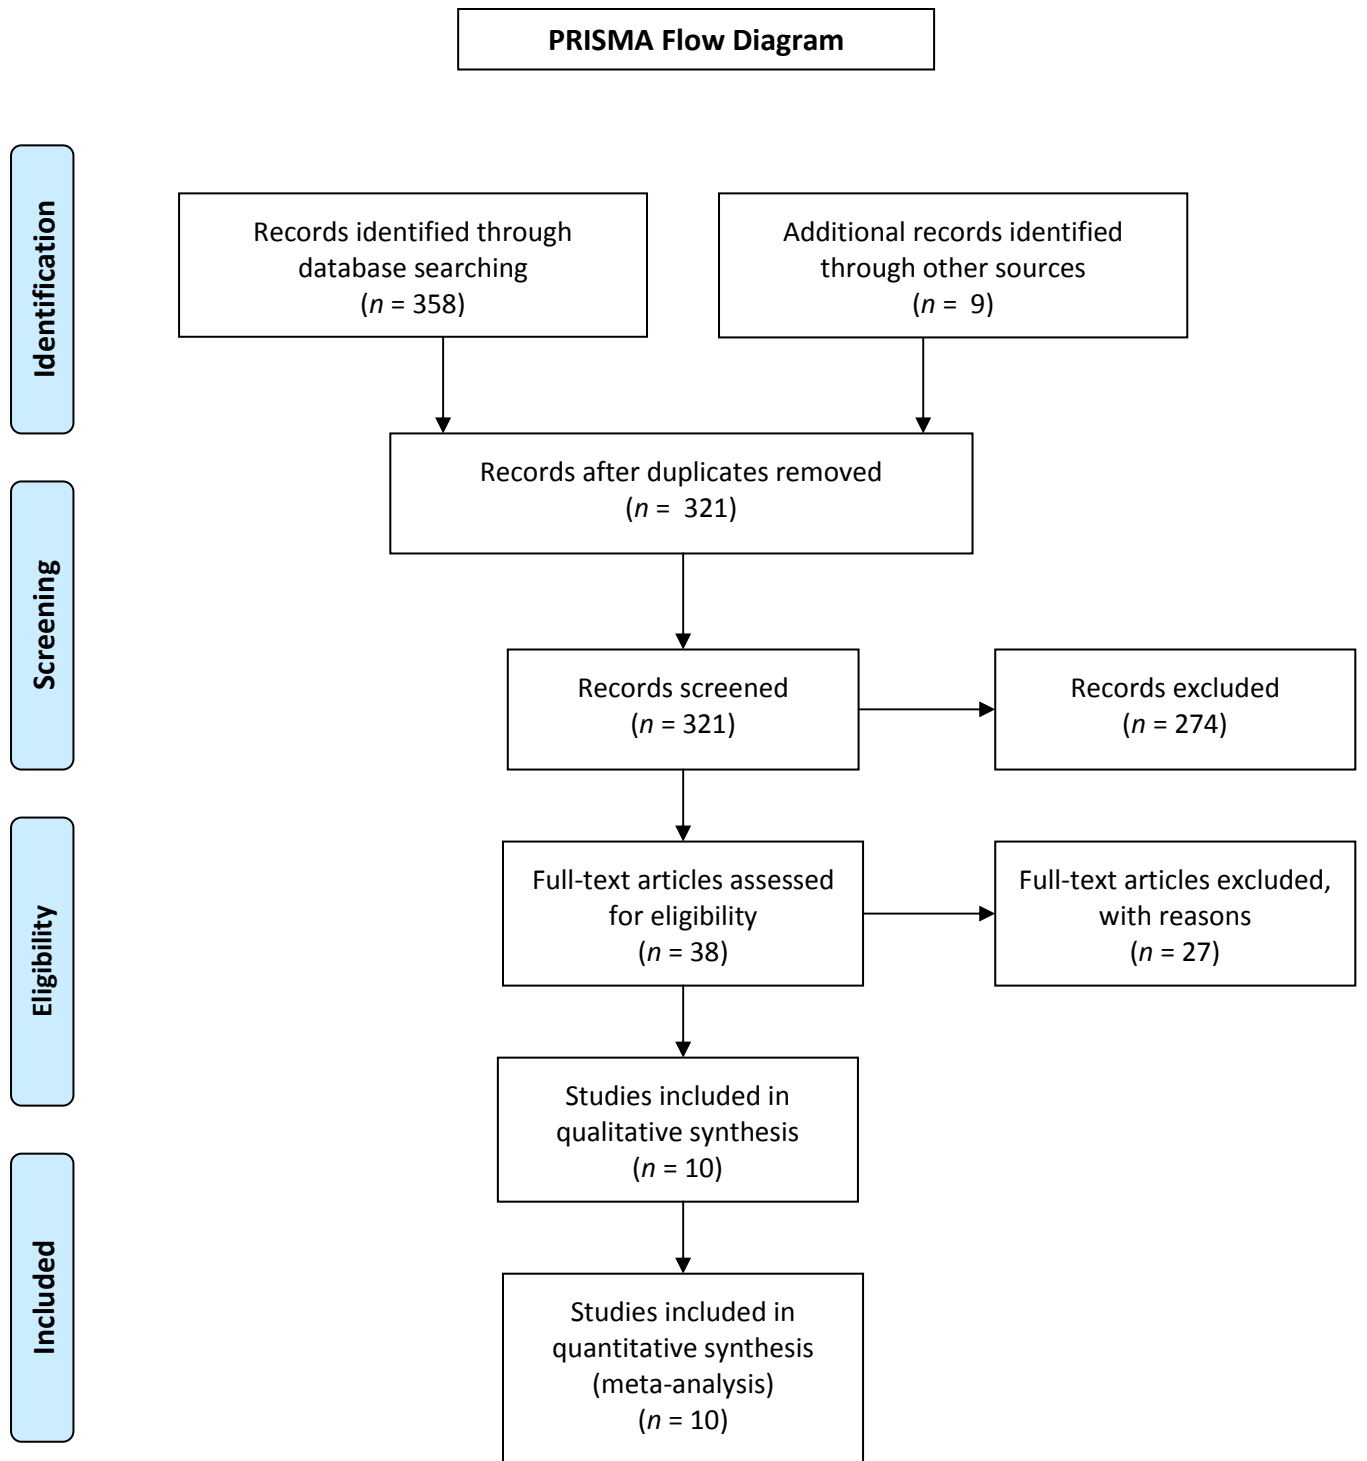

Supplement: appi.psychotherapy.20190025.ds001.pdf [file appi.psychotherapy.20190025.ds001.pdf]
